# Supplementary material for: Causal associations between constipation and pan-cancer: a bidirectional Mendelian randomization study
Source: Front Oncol. 2024 Sep 13;14:1428003. doi: 10.3389/fonc.2024.1428003 (PMC11427234; doi:10.3389/fonc.2024.1428003)
Supplement: Supplementary file 2 [file Table1.xlsx]

## Sheet: Sheet1
Supplemental Table 1. Overview of the details of data
Trait	GWAS ID	Consortium	Sample size	Case	Control	Number of SNPs	Population	PMID/DOI	Publication Year	First author	ICD-10	Source
Constipation	finn-b-K11_CONSTIPATION	FinnGen	218792	17246	201546	16380466	European	NA	2021	NA	K59.0	IEU OpenGWAS (https://gwas.mrcieu.ac.uk/)
Lung cancer	ieu-a-987	TRICL	85449	29863	55586	10439018	European	28604730	2017	James D et al.	C34	IEU OpenGWAS (https://gwas.mrcieu.ac.uk/)
Breast cancer	ieu-a-1126	BCAC	228951	122977	105974	10680257	European	34594039	2021	Michailidou K et al.	C50	IEU OpenGWAS (https://gwas.mrcieu.ac.uk/)
Oral cavity and pharyngeal cancer	ieu-b-89	Oncoarray oral cavity and oropharyngeal cancer	5425	2497	2928	7514278	European	27749845	2016	Lesseur et al.	C10	IEU OpenGWAS (https://gwas.mrcieu.ac.uk/)
Liver & bile duct cancer	ieu-b-4915	UK Biobank	372366	350	372016	7687713	European	10.5523/bris.aed0u12w0ede20olb0m77p4b10	2021	Burrows et al.	C22	IEU OpenGWAS (https://gwas.mrcieu.ac.uk/)
Esophageal cancer	ieu-b-4960	UK Biobank	372756	740	372016	8970465	European	10.5523/bris.aed0u12w0ede20olb0m77p4b11	2021	Burrows et al.	C15	IEU OpenGWAS (https://gwas.mrcieu.ac.uk/)
Ovarian cancer	ieu-b-4963	UK Biobank	199741	1218	198523	9822229	European	10.5523/bris.aed0u12w0ede20olb0m77p4b12	2021	Burrows et al.	C56	IEU OpenGWAS (https://gwas.mrcieu.ac.uk/)
Skin melanoma cancer	ieu-b-4969	UK Biobank	375767	3751	372016	11396019	European	10.5523/bris.aed0u12w0ede20olb0m77p4b13	2021	Burrows et al.	C43	IEU OpenGWAS (https://gwas.mrcieu.ac.uk/)
Colorectal cancer	ieu-b-4965	UK Biobank	377,673	5657	372016	11738639	European	10.5523/bris.aed0u12w0ede20olb0m77p4b14	2021	Burrows et al.	C18,C19,C20	IEU OpenGWAS (https://gwas.mrcieu.ac.uk/)
Brain cancer	ieu-b-4875	NA	372622	606	372016	8629116	European	10.5523/bris.aed0u12w0ede20olb0m77p4b15	2021	Burrows et al.	C71	IEU OpenGWAS (https://gwas.mrcieu.ac.uk/)
Bladder cancer	ieu-b-4874	NA	373295	1279	372016	9904926	European	10.5523/bris.aed0u12w0ede20olb0m77p4b16	2021	Burrows et al.	C67	IEU OpenGWAS (https://gwas.mrcieu.ac.uk/)
Cervical cancer	ieu-b-4876	NA	199086	563	198523	8506261	European	10.5523/bris.aed0u12w0ede20olb0m77p4b17	2021	Burrows et al.	C53	IEU OpenGWAS (https://gwas.mrcieu.ac.uk/)
Prostate cancer	ebi-a-GCST006085	NA	140254	79148	61106	19733911	European	29892016	2018	Schumacher FR et al.	C61	IEU OpenGWAS (https://gwas.mrcieu.ac.uk/)
Endometrial cancer	ebi-a-GCST006464	NA	121885	12906	108979	9470555	European	30093612	2018	O'Mara TA et al.	C54.1	IEU OpenGWAS (https://gwas.mrcieu.ac.uk/)
Thyroid cancer	GCST90399736	NA	1339769	6015	1333754	NA	European	36777996	2022	Zhou W et al.	C73	GWAS Catalog(https://www.ebi.ac.uk/gwas)
gastric cancer	GCST90043847	NA	456348	145	456203	NA	European	34737426	2021	Jiang L et al.	C16.9	GWAS Catalog(https://www.ebi.ac.uk/gwas)
Pancreatic cancer	GCST90041814	NA	456348	587	455761	NA	European	34737426	2021	Jiang L et al.	C25	GWAS Catalog(https://www.ebi.ac.uk/gwas)
SNP, Single Nucleotide Polymorphism; GWAS, genome-wide association study.
